# Supplementary material
Source: PubMed Central journal article supplement (PMC2709226)
Supplement: 11103_2008_9404_MOESM1_ESM.pdf [file 11103_2008_9404_MOESM1_ESM.pdf]

site IV site V

311 PDGT GMYECLDLYPVGG--NSSEMLG-----GDDSPDVL faSST  
 272 KDNVGMLECVDLYPVATTGN-QI G--NGL EMQVGF GKGI K asSST  
 272 KDSVGMLECVDLYPVATTGN-QI G--NGL EMKGGSGKGI K acSST  
 312 PKGTGEYECLDLYAVGGGRKASDMYN-----STAE-DVL taSST  
 301 PDGT GMYECLDLYPVGG--NSSEMLG-----GDS SPEVL lpSST  
 281 PH-TGMWECVDLYPVSTVHT-----NGL DMVDN- GPNVK htSST  
 290 PH-TGMWECVDLYPVSTTHT-----NGL DMVDN- GPNVK csSST  
 293 PH-TGMWECVDLYPVSTTHT-----NGL DMKDN- GPNVK ciSST  
 285 PH-TGMWECVDLYPVSTTHT-----NGL DMMDN- GPNVK toSST  
 337 VERVGMWECVDFYPVATADSSHAN--HGL DPSARPSPAVK acINV  
 310 PG-TGMWECVDFYPI SKQGE-----NGL DTSVD- GPGVK ciINV  
 317 PG-TGMWECVDFYPVSVTVS-----NGL DTSVN- GPGVK dclINV  
 307 PN-TGMWECVDFYPVSKTAG-----NGL DTSVN- GPDVK atINV  
 329 QG-TGMWECVDFYPVSAEP-----NGL DSTN- DQSVK bviINV  
 320 PG-TGMWECVDLYPVSTTGE-----NGL DTSVN- GLDVK ibINV  
 291 PG-TGMWECVDFYPVSTKKT-----NGL DTSYN- GPGVK leINV  
 239 STNTGNWECPDFFPVSLNST-----NGL DVSYR- GKNVK lpINV  
 307 PG-TGMWECVDLYPVSTTGE-----NGL DTSVN- GLGVK osINV  
 294 PG-TGMWECVDFYPVSTTEKT-----NGL DTSYN- GPGVK stINV  
 149 P-GTGMWECIDFYPVGGGA-----DGSEEL taINV(part)  
 315 VPGTGMWECVDFYPVVAGSGAAAGSGDGLLETSAAPGPGVK zmlINV

site VI

343 FVLKESDDDRHDYYALGRFDAAANI WTPIDQELDLGI-- faSST  
 309 HVLKASMDDERHDYYAIGTFDLESFTWPDDDTI DVG-- asSST  
 309 HVLKASMDDERHDYYAIGTFDLESFSWPDDDTI DVG-- acSST  
 345 YVLKESDDDRHDWYSLGRFDAAANKWTPIDEELDGV-- taSST  
 333 FVLKESANDEWHDYYALGWFDAAANTWTPQDPEADLGI-- lpSST  
 313 YVLKQSGDEDRHDWYAI GSYDI VNDKWYPDDPENDVGI-- htSST  
 322 HVLKQSGDEDRHDWYALGTVDVNDKWYPDDPENDVGI-- csSST  
 325 YILKQSGDEDRHDWYAVGTFDPEKDKWYPDDPENDVGI-- ciSST  
 317 YILKQSGDEDRHDWYAI GSFDPINDKWYPDDPENDVGI-- toSST  
 375 HVLKASMDDRHDYYAIGTYDPAQNTWPDASVDVGI-- acINV  
 342 HVVKASMDDDRNDYYAIGTYDAYKWKWTPDNPTLDVGI-- ciINV  
 349 HVLKSSLDDDRHDYALGTYPDPI NDKWTPDNPELDVGI-- dclINV  
 339 HILVKASMDDRFDHYAVGTYFDSNGTWTPDDPTI DVGMTA atINV  
 361 HVLKASMDDDRNDYYTLGTIEDNVTWTPDNPAIDVGI-- bviINV  
 352 HVLKASLDDDKHDYYALGTYPDAKKNKWT PDNTDL DVGI-- ibINV  
 323 HVLKASLDDNKQDHYAIGTYDLGKNKWT PDNPELDVGI-- leINV  
 272 YVLKNSLDVAREFDYYTIGMYHTKI DRYIPNNNSIDG--WK lpINV  
 339 HVLKTSLDDDKHDYYALGTYPVKNKWT PDNPDLDVGI-- osINV  
 326 HVLKASLDDNKQDHYAIGTYDLTKNKCT PDNPELDVGI-- stINV  
 172 YVMKESDDDRHDWYALGRYDAAANKYTPIDAEMDVGI-- taINV(part)  
 355 HVLKASLDDDKHDYYAIGTYDPATDTWTPDSAEDDVGI-- zmlINV

site VII

381 GLRYDWGKYIYASKSFYDQKKNRRI VWAYI GETDS- EQADI faSST  
 347 GLRYDYGKFYASKTFYDQEKRRRI LWGYVGEVDS- KTDDA asSST  
 347 GLRYDYGKFYASKTFYDQEKRRRI LWGYVGEVDS- KADDI acSST  
 383 GLRYDWGKYIYASKSFYDPVKRRRVWAYV GETDS- ERADI taSST  
 371 GLRYDWGKYIYASKSFYDPI KNRRRVWAFV GETDS- EQADK lpSST  
 351 GLRYDFGKFYASKTFYDQHKRRRVLWGYV GETDP- QKYDL htSST  
 360 GLRYDFGKFYASKTFYDQHKRRRVLWGYV GETDP- PKYDV csSST  
 363 GLRYDYGKFYASKTFYDQHKRRRVLWGYV GETDP- PKS DL ciSST  
 355 GLRYDYGKFYASKTFYDQHKSRRVLWGYV GETDP- PKDDL toSST  
 413 GLRYDWGKFYASKTFYDHA KRRRI LWSW GETDS- ETADI acINV  
 380 GLRYDYGIYYASKTFYDQNKQRRVLWGW KETDT- EASDI ciINV  
 387 GLRLDYGKYIYASKTFYDQDKERRLLWGW GESDN- ESTDL dclINV  
 379 SLRYDYGKFYASKSFYDQNKGRRVLWGW GESDS- EASDV atINV  
 399 GLRYDYGRFYASKTFYDHEKRRRI LWGW TEGDS- EAADV bviINV  
 390 GLRLDYGKYIYASKTFYDQNKQRRRI LWGW GETDL- EAVDL ibINV  
 361 GLRLDYGKYIYASKTFYDPKERRRVLWGW GETDS- ESADL leINV  
 310 GLRLDYGNFYASKTFYDPSRNRRVI WGSNESDVL PDDDI lpINV  
 377 GLRLDYGKYIYARTFYDQNKQRRRI LWGW GETDL- EAVDL osINV  
 364 GLKLDYGKYIYASKTFYDPKQRRVLWGW GETDS- ESADL stINV  
 210 GLRYDWGKFYASKTFYDPSKNRRRVLWGW GETDS- ERADV taINV(part)  
 393 GLRYDYGKYIYASKTFYDPVLRRRRVLWGW GETDS- ERADI zmlINV

site VIII

420 TKGWANLMTI PRTVELDKKT RTNLI QWPVEELDTL RRNS- faSST  
386 RKGWANVLNI ARTILFDVKT RSNLLVWPVEELDALRTSS- asSST  
386 LKGWASVQNI ARTILFDAKT RSNLLVWPVEELDALRTSG- acSST  
422 TKGWANLQSI PRTVELDEKT RTNLVQWPVEELDALRI NT- taSST  
410 AKGWASLMSI PRTVELDKKT RTNLI QWPVEEIE TLR RNV- lpSST  
390 SKGWANILNI PRTVLDLET KTNLI QWPVEE T ENLR SKKY htSST  
399 YKGWANILNI PRTVLDLTKT NTLI QWPVEEVENLR SNKY csSST  
402 LKGWANILNI PRSVLDTQT GTNLI QWPVEEVEKLR STKY ciSST  
394 LKGWANMLNI PRTVLDLVT GTNLI QWPVEEVENLR SKKY toSST  
452 AKGWASLQGV PRTVLLDVKT GSNLI TWPVVEIE SLRTRP- acINV  
419 KKGWASLMGVPRTI VLDKKTQSNII QWPVEEINL LR TNL- ciINV  
426 LKGWASVQSI PRTVVFDDKKT GTNLI QWPVKEVESLR SRS- dclINV  
418 QKGWASLQGI PRTVLDLTKT GKNLVQWPVEEIKSLR LSS- atINV  
438 KKGWASLQGI PRTVLDLTKT RTNLVQWPVEEIE TLR QNN- bvINV  
429 MKGWASLQAI PRTVLDLTKT GTNVL QWPVEEVEESLRSGD- ibINV  
400 QKGWASVQSI PRTVLDLTKT GTHLLQWPVEEIE SLRVGD- leINV  
350 KKGWASLQAI PRTVLDLTKT GTHLLQWPVEEIE TLR KQK- lpINV  
416 MKGWASLQAI PRTVLDLTKT GTNVL QRPEEVEESWS SGD- osINV  
403 QKGWASVQSI PRTVLDLTKT GTHLLQWPVEEIE SLRGGD- stINV  
249 AKGWASLQSI PRTVELDEKT RTNLI QWPVEEIE TLR I NS- talINV(part)  
432 LKGWASVQSI PRTVLLDLTKT GSNLLQWPVVEEVENLRMSG- zmlINV

459 TDL SGI TVDAGS V I R L P L H Q G A Q I D I E A S F Q L N S S D V D A L faSST  
425 KEFNGVVVEPGFTYHL DVGTASQLDI EA E F E I N Q E A V D A V asSST  
425 KEFNGVVVEPGSTYHL DVGTATQLDI EA E F E I N K E A V D A V acSST  
461 TDL SGI TVGAGS V A F L P L H Q T A Q L D I E A T F R I D A S A I E A L taSST  
449 TDLGGITVEAGS V I H L P L Q Q G G Q L D I E A S F R L N S S D I D A L lpSST  
430 DEFKDVELRPGALVPLEI GTATQLDI V A T F E I D Q K M L E S T htSST  
439 NEFKDVELKPGSLI PLEI GTATQLDI T A T F E V D Q T M L E S T csSST  
442 DEFKDVELRPGSLVPLEI GTATQLDI S A T F E I D Q K K L Q S T ciSST  
434 DEFKDVELRPGSI I PLEI GSATQLDI M A T F E I D E K M L E S T toSST  
491 RDFSIGITVDAGSTFKLDVGGAAQLDI EA E F K I S S E E L E A V acINV  
458 TVFKTVVVESGSLVPLNLPASQLDI V A E F E V D K K T V E R L ciINV  
465 YEINDVELKPGSLVPLKI S S A A Q L D I V A S F E V D E E A F K R T dclINV  
457 KQFD-LEVGPGSVVPVDVGSAAQLDI EA E F E I N K E S L D K I atINV  
477 KDFDKVEVPAGSVVPLDVSAATEI DI I A E F D I D K E A L E N L bvINV  
468 PITAEANLEPGSVVPI HVSEGTQLDI T A S F E V D E T L L E T T ibINV  
439 PTVKQVDLQPGSIELLRVDSAAELDI EA S F E V D K V A L Q G I leINV  
388 VQLNNKKLSKGE M F E V K G I S A S Q A D V E V L F S F S S - L N K A lpINV  
455 PITQRRIFEPGSVVPI HVSGATQLDI T A S F E V D E T L L E T T osINV  
442 PIVKQVNLQPGSIELHVDSAAELDI EA S F E V D K V A L Q G I stINV  
288 TDLGGTITD TGSVLPPLRRATQLDI E A T F H L D T S A I A A V talINV(part)  
471 KSF D G V A L D R G S V V P L D V G K A T Q L D I E A V F E V D A S D A A G V zmlINV

499 TEADV- - - - - S Y N C S T S - G A A V R G A L G P F G L L V L A N - G R faSST  
465 VEADV- - - - - T Y N C S T S D G S A H R G L L G P F G L L V L A N E K M asSST  
465 VEADV- - - - - T Y N C S T S D G A A H R G L L G P F G L L V L A N E K M acSST  
501 NEADV- - - - - S Y N C T T S S G A A T R G A L G P F G L L V L A N R A L taSST  
489 NEADV- - - - - G F N C S S S D G A A V R G A L G P F G L L V F A D - G R lpSST  
470 LEADV- - - - - F N C T T S E G S V A R S V L G P F G V V L A D A Q R htSST  
479 LEADV- - - - - F N C T T S E G S A G R G V L G P F G L V V L A D A E R csSST  
482 LEADV- - - - - F N C T T S E G S V G R G V L G P F G I V V L A D A N R ciSST  
474 LEADV- - - - - F N C T T S E G S V G R G V L G P F G I V V L A D A K R toSST  
531 KEADV- - - - - S Y N C S S S G G A A E R G V L G P F G L L V L A N Q D L acINV  
498 NGAD- - - - - I A Y D C A K N G G A A Q R G A L G P F G F S V L A H E G L ciINV  
505 YEAD- A - - - - S Y N C T A S E G A A G R G I L G P F G I L V L A D D P L dclINV  
496 IGNASVVAEAE E F S C E K S G G S T V R G A L G P F G F S V L A T E S L atINV  
517 PVSE- - - - - E H Y S C P A S K G A A Q R G A L G P F G L L V L A N N D L bvINV  
508 SESHDA- - - - - G Y D C S N S G G A V T R G S L G P F G L L V V A D E K L ibINV  
479 I E A D H V - - - - - G F S C S T S G G A A S R G I L G P F G V I V I A D Q T L leINV  
426 EQFDPRWADLYAQDVCAI KGSTI QGG L G P F G L A T L A S K N L lpINV  
495 SESHDA- - - - - G Y D C S N S G G A G T R G S L G P F G L L V V A D E K L osINV  
482 I E A D H V - - - - - G F S C S T S G G A A S R G I L G P F G V V I A D Q K L stINV  
328 NEADV- - - - - G Y N C S T S G G A A N R G A L G P F G L L V L A D G A L talINV(part)  
511 TEADV- - - - - T F N C S T S A G A A G R G L L G P F G L L V L A D D D L zmlINV
